# Supplementary material for: Filter Bubbles, Echo Chambers, and Online News Consumption
Source: Oxford University Press journal article supplement (doi:10.1093/poq/nfw006), 2016-01-01
Supplement: nfw006_Supplementary_Data.zip [file nfw006_Supplementary_Data.zip]

Archive with 2 entries (2 files):
- references.pdf
- poq_15_0031_File009.pdf
