# Supplementary material for: Filter Bubbles, Echo Chambers, and Online News Consumption
Source: Oxford University Press journal article supplement (doi:10.1093/poq/nfw006), 2016-01-01
Supplement: nfw006_Supplementary_Data.zip [file nfw006_Supplementary_Data.zip › references.pdf]

## References

- [1] Haewoon Kwak et al. “What is Twitter, a social network or a news media?” In: *WWW '10: Proceedings of the 19th international conference on World wide web*. Raleigh, North Carolina, USA: ACM, 2010, pp. 591–600. ISBN: 978-1-60558-799-8. DOI: <http://doi.acm.org/10.1145/1772690.1772751>.
- [2] James W Pennebaker et al. “The development and psychometric properties of LIWC2007”. In: *Austin, TX, LIWC. Net* (2007).
- [3] Eric J Glover et al. “Improving category specific web search by learning query modifications”. In: *Symposium on Applications and the Internet*. IEEE. 2001, pp. 23–32.
- [4] Christopher D Manning and Hinrich Schütze. *Foundations of statistical natural language processing*. Vol. 1. MIT Press, 1999.
- [5] Dong C Liu and Jorge Nocedal. “On the limited memory BFGS method for large scale optimization”. In: *Mathematical programming* 45.1-3 (1989), pp. 503–528.
- [6] Tim Groseclose and Jeffrey Milyo. “A measure of media bias”. In: *The Quarterly Journal of Economics* 120.4 (2005), pp. 1191–1237.
- [7] Matthew Gentzkow and Jesse M Shapiro. “What drives media slant? Evidence from US daily newspapers”. In: *Econometrica* 78.1 (2010), pp. 35–71.
- [8] David Tewksbury. “The seeds of audience fragmentation: Specialization in the use of online news sites”. In: *Journal of broadcasting & electronic media* 49.3 (2005), pp. 332–348.
- [9] Matthew Gentzkow and Jesse M Shapiro. “Ideological segregation online and offline”. In: *The Quarterly Journal of Economics* 126.4 (2011), pp. 1799–1839.
- [10] Sendhil Mullainathan and Andrei Shleifer. “The market for news”. In: *American Economic Review* (2005), pp. 1031–1053.
- [11] Matthew Gentzkow and Jesse M Shapiro. “Media bias and reputation”. In: *Journal of Political Economy* 114.2 (2006), pp. 280–316.
- [12] Shanto Iyengar and Kyu S Hahn. “Red media, blue media: Evidence of ideological selectivity in media use”. In: *Journal of Communication* 59.1 (2009), pp. 19–39.
- [13] Stefano DellaVigna and Ethan Kaplan. “The Fox News effect: media bias and voting”. In: *The Quarterly Journal of Economics* 122.3 (2007), pp. 1187–1234.
- [14] Matthew A Baum and Tim Groeling. “New media and the polarization of American political discourse”. In: *Political Communication* 25.4 (2008), pp. 345–365.

- [15] Eytan Bakshy, Solomon Messing, and Lada Adamic. “Exposure to ideologically diverse news and opinion on Facebook”. In: *Science* (2015), aaa1160.
